also has instituted a registry of "blood patch" treatment for postspinal headache, the results of which are published in this section.<sup>3</sup>

Annual meetings of SOAP have planned scientific sessions. Formal presentations on a specific topic are delivered by guest speakers. Reviews of "what is new in obstetric anesthesia," "what is new in obstetrics," and "what is new in neonatology" are given by members who are specialists in these fields. Presentations of "work-in-progress" are followed by discussions and constructive criticism. Next year's SOAP Meeting will be held in Philadelphia under the aegis of B. B. Gutsche. All interested physicians are welcome!

CERTIE F. MARX, M.D.  
Professor of Anesthesiology  
Albert Einstein College of Medicine  
1300 Morris Park Avenue  
Bronx, New York 10461

The historical data were compiled from information provided by Mr. John W. Andes, Executive Secretary of ASA, and Dr. Otto C. Phillips, to whom I express my thanks.

### References

1. Shnider SM: Training in obstetric anesthesia in the United States. *Am J Obstet Gynecol* 93:243-252, 1965
2. American Society of Anesthesiologists—Obstetric Anesthesia Committee Seminar on Obstetric Anesthesia Coverage at Magee-Womens Hospital, Pittsburgh, Pennsylvania, June 10, 1966
3. Marx GF, Shnider SM: The obstetric suite, Handbook of Hospital Facilities for the Anesthesiologist. Second edition. Edited by JT Martin. American Society of Anesthesiologists, 1974 pp 179-184
4. ACOG Technical Bulletin, number 11: Obstetric Analgesia and Anesthesia. February 1969 and revised, October 1973
5. Ostheimer GW, Palahniuk RJ, Shnider SM: Epidural blood patch for post-lumbar-puncture headache. *ANESTHESIOLOGY* 41:307-308, 1974

(Accepted for publication June 1974.)

## Halothane MAC in the Rabbit

*To the Editor:*—The development of a reliable method for endotracheal intubation and halothane anesthesia in white New Zealand rabbits<sup>1</sup> has facilitated the use of these animals for major surgical and shock experiments in our laboratory. To monitor the rabbits a simple, reliable means for assessing anesthetic depth was needed. Therefore, we determined the minimum alveolar concentration (MAC)<sup>2</sup> of halothane in unpremedicated, spontaneously breathing rabbits under normothermic, normotensive conditions with blood gases maintained in the normal range. MAC was determined as the mean of the lowest alveolar concentration preventing and the highest permitting a response when the rabbit's tail was clamped with a bulldog arterial clamp. MAC was determined after an anesthetic equilibrium had been reached, assessed as inspired halothane concentration approximately 10 per cent

higher than expired gas tension. Expired gas samples were obtained by aspirating serial (1 ml) samples at the end of each spontaneous expiration through an intracath catheter located at the tip of the endotracheal tube. The mean halothane MAC for these rabbits was  $0.82 \pm 0.3$  vol per cent. Arterial blood samples were simultaneously drawn with the end-tidal gas samples and also analyzed for halothane. The average arterial halothane value corresponding to MAC was  $27.6 \pm 8$  mg/100 ml. Both arterial blood and end-tidal gas samples were analyzed for halothane by gas chromatography. Our studies are in agreement with findings of other investigators<sup>3</sup> who have shown that the anesthetic requirement for halothane cannot be accurately measured from inspired gas samples. The inspired-to-alveolar gradient in our rabbits showed the inspired halothane concentration to be approximately 10 per cent higher than the alveolar concentration.

These "MAC" values for both alveolar and arterial blood halothane concentrations are reported for the information of other investigators interested in the anesthetic requirement for halothane of the rabbit.

NANCY L. DAVIS, M.D.  
RAY L. NUNNALLY, M.S.  
THEODORE I. MALININ, M.D.  
*University of Miami School of Medicine  
Miami, Florida 33152*

#### REFERENCES

1. Davis NL, Malinin TI: Endotracheal intubation and halothane anesthesia in rabbits. *Lab Anim Sci* (in press)
2. Eger EI II, Saidman LJ, Brandstater B: Minimum alveolar concentration: A standard of anesthetic potency. *ANESTHESIOLOGY* 26: 756-763, 1965
3. White PF, Johnson RR, Eger EI II: Determination of anesthetic requirement in rats. *ANESTHESIOLOGY* 40:52-57, 1974

(Accepted for publication April 19, 1974.)

### Isoflurane Metabolism

*To the Editor:*—The paper "Metabolism of Isoflurane in Fischer 344 Rats and Man" by Hitt *et al.* (*ANESTHESIOLOGY* 40:62-67, 1974) shows the formation of fluoride ion and "non-ionic" fluoride, probably trifluoroacetic acid, from isoflurane *in vivo*. Two possible pathways for the metabolism are given, and while the equations are not balanced, they both predict, by stoichiometry, two moles of fluoride ion for each mole of trifluoroacetic acid. Furthermore, because of the known lack of biotransformation of trifluoromethyl groups<sup>1,2</sup> and the known ease of biotransformation of CF<sub>2</sub>H groups,<sup>2,3</sup> for each mole of isoflurane metabolized two moles of fluoride ion and one mole of a trifluoromethyl-containing metabolite (*i.e.*, trifluoroacetic acid) are to be expected regardless of the pathway.

Summing the values for excretion given in figures 1 and 2 in the paper by Hitt *et al.* shows that the ratio of fluoride ion to trifluoroacetic acid in rats is approximately 1.6 to 1, close to stoichiometric. However, in man the ratio is 0.3 to 1. Thus, the evidence needing explanation in the comparison of rats and man is not the high fluoride excretion in rats but the low fluoride excretion in man.

The authors suggest three possible answers for the patterns of fluoride excretion. Two of the suggestions, more complete biotrans-

formation of non-ionic intermediates in rats and binding of non-ionic fluoride to protein, would explain high fluoride ion-to-non-ionic fluoride ratios but not the observed low ratios. The third suggestion, differences in renal excretion, deserves more consideration, but the focus should not necessarily fall on the kidney. It is well known that not all the fluoride ion ingested is excreted in the urine.<sup>4</sup> The amount excreted is often 50 per cent or less. Therefore, the question of the fate of the missing fluoride in the metabolism of isoflurane in man remains unanswered.

LOUIS L. FERSTANDIG, PH.D.  
*Technical Director  
Halocarbon (Ontario) Ltd.  
P. O. Box 205  
Malton, Ontario L4T 3B6, Canada*

#### REFERENCES

1. Cohen EN: Metabolism of the volatile anesthetics. *ANESTHESIOLOGY* 35:193-202, 1971
2. Cascorbi HF: Biotransformation of drugs used in anesthesia. *ANESTHESIOLOGY* 39:115-125, 1973, and references therein
3. Chase RE, Holaday DA, Fiserova-Bergerova V, et al: The biotransformation of Ethrane in man. *ANESTHESIOLOGY* 35:262-267, 1971
4. Largent EJ: Fluorosis. Columbus, Ohio State University Press, 1961, p 23

(Accepted for publication April 24, 1974.)
